# Supplementary material for: A naked-eye colorimetric sensor based on chalcone for the sequential recognition of copper(ii) and sulfide ions in semi-aqueous solution: spectroscopic and theoretical approaches
Source: Royal Society of Chemistry journal article supplement (doi:10.1039/d1nj00583a), 2021-01-01
Supplement: d1nj00583a1.pdf [file d1nj00583a1.pdf]

**A naked-eye colorimetric sensor based on chalcone for sequential recognition of copper (II) and sulfide in semi-aqueous solution: Spectroscopic and Theoretical approaches**

Nidhi Singh<sup>1</sup>, Ramesh Chandra<sup>1,2\*</sup>

<sup>1</sup>Department of Chemistry, University of Delhi, Delhi 110007, India

<sup>2</sup>Dr .B. R. Ambedkar Center for Biomedical Research, University of Delhi, Delhi 110007, India

\*Corresponding author:

Prof. Ramesh Chandra,

Drug Discovery & Development Laboratory,

Department of Chemistry, University of Delhi and

Dr.B.R.Ambedkar Center for Biomedical Research,

University of Delhi, Delhi- 110007, India

Email: [rameshchandragroup@gmail.com](mailto:rameshchandragroup@gmail.com), [acbrdu@hotmail.com](mailto:acbrdu@hotmail.com)

**Figure S1.** Benesi Hilderbrand plot of A01 (Absorbance at 504 nm) assuming 1:1 stoichiometry of A01-Cu<sup>2+</sup> complex.

**Figure S2.** Modified Benesi Hilderbrand plot of A01 (Absorbance at 504 nm) assuming 2:1 stoichiometry of A01-Cu<sup>2+</sup> complex

**Figure S3.** Benesi Hilderbrand plot of A01 (Absorbance at 504 nm) assuming 1:2 stoichiometry of A01-Cu<sup>2+</sup> complex.

**Figure S4.** Job plot of A01 and Cu<sup>2+</sup> in CH<sub>3</sub>CN-H<sub>2</sub>O (1:1, v/v; HEPES, 20 mM; pH = 7.4), the total concentration of [Cu<sup>2+</sup>] and [A01] is 40 μM.

**Figure S5.** Determination of the detection limit of A01 (40 μM) for Cu<sup>2+</sup> based on change of absorbance at 504 nm.

**Figure S6.** Absorption spectra of A01 (40 μM) in the presence of different salts of copper (40 μM) in CH<sub>3</sub>CN-H<sub>2</sub>O (1:1, v/v; HEPES, 20 mM; pH = 7.4).

**Figure S7.** Reversible absorption spectral changes of A01 (40 μM) after sequential addition of Cu<sup>2+</sup> (1.0 eq.) and EDTA (1.0 eq.) in CH<sub>3</sub>CN-H<sub>2</sub>O (1:1, v/v; HEPES, 20 mM; pH = 7.4).

**Figure S8.** Determination of the detection limit of A01-Cu<sup>2+</sup> (40 μM) for S<sup>2-</sup> based on change of absorbance at 504 nm.

**Figure S9.** Optimized structure of A01.

**Figure S10.** HOMO and LUMO surfaces of optimized structure A01 and their respective energy values.

**Table S1.** Various global reactivity indices (in eV) of A01 in the gas phase.

**Figure S11.** Molecular electrostatic potential map of A01

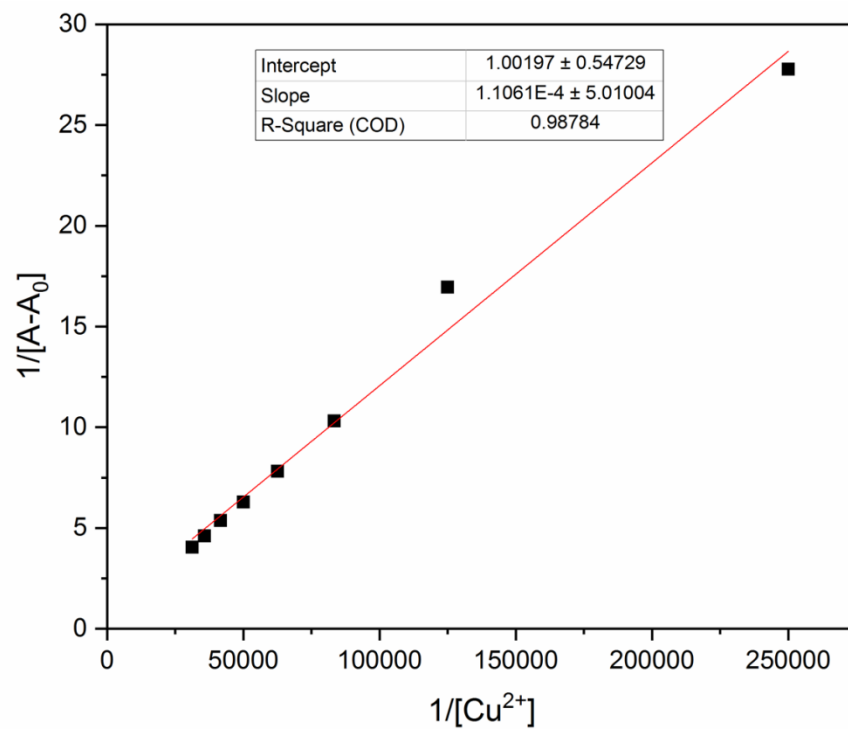

**Figure S1.** Benesi Hilderbrand plot of A01 (Absorbance at 504 nm) assuming 1:1 stoichiometry of A01-Cu<sup>2+</sup> complex.

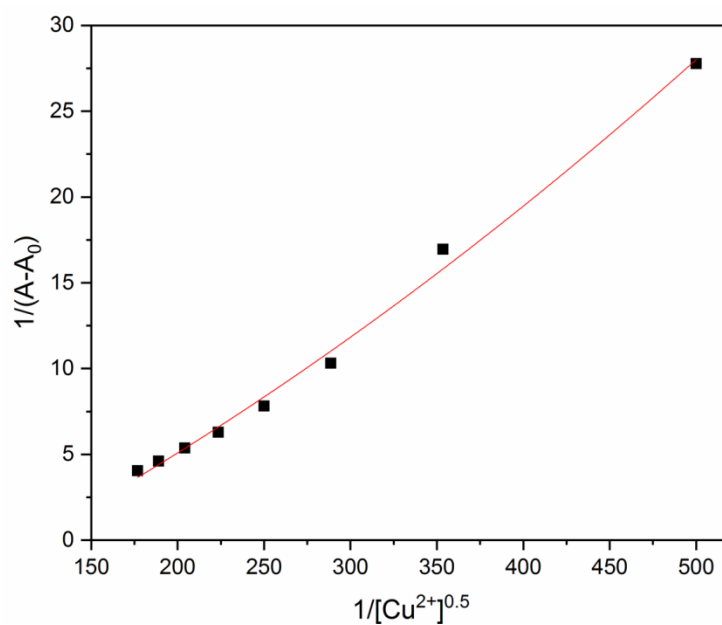

**Figure S2.** Modified Benesi Hilderbrand plot of A01 (Absorbance at 504 nm) assuming 2:1 stoichiometry of A01-Cu<sup>2+</sup> complex

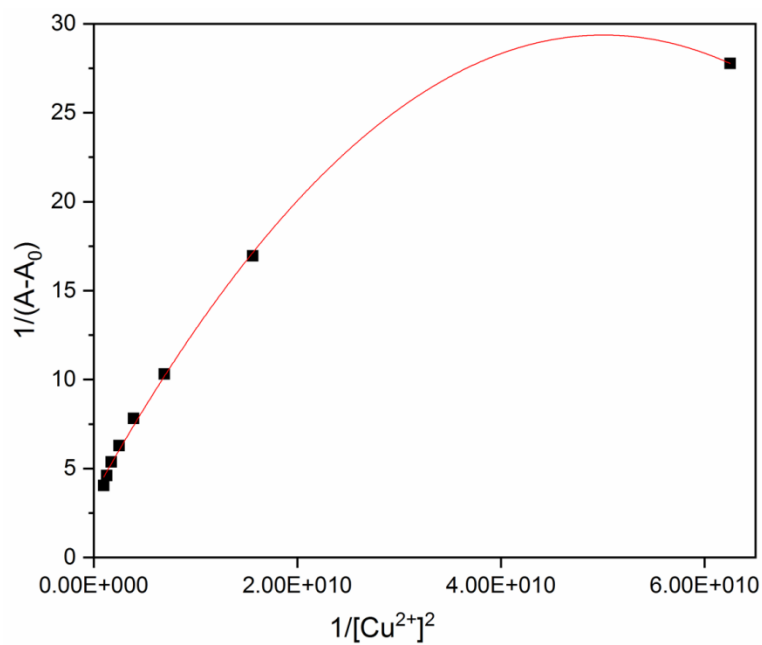

**Figure S3.** Benesi Hilderbrand plot of A01 (Absorbance at 504 nm) assuming 1:2 stoichiometry of A01-Cu<sup>2+</sup> complex.

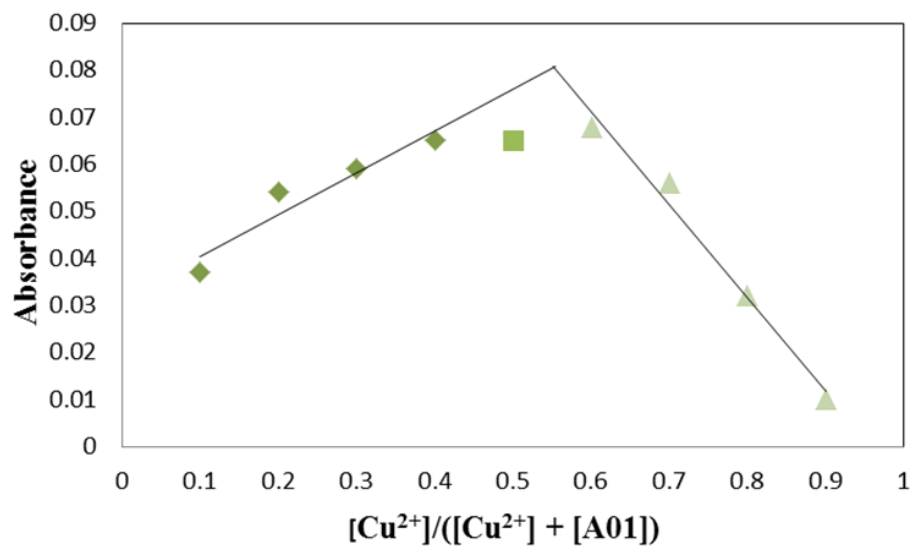

**Figure S4.** Job plot of A01 and Cu<sup>2+</sup> in CH<sub>3</sub>CN-H<sub>2</sub>O (1:1, v/v; HEPES, 20 mM; pH = 7.4), the total concentration of [Cu<sup>2+</sup>] and [A01] is 40μM.

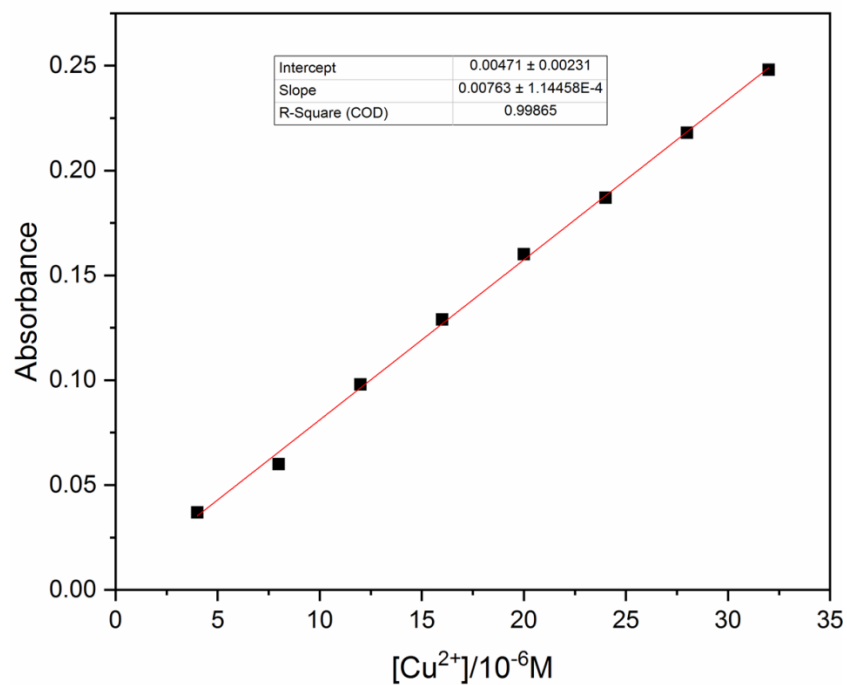

**Figure S5.** Determination of the detection limit of A01 (40  $\mu\text{M}$ ) for  $\text{Cu}^{2+}$  based on change of absorbance at 504 nm.

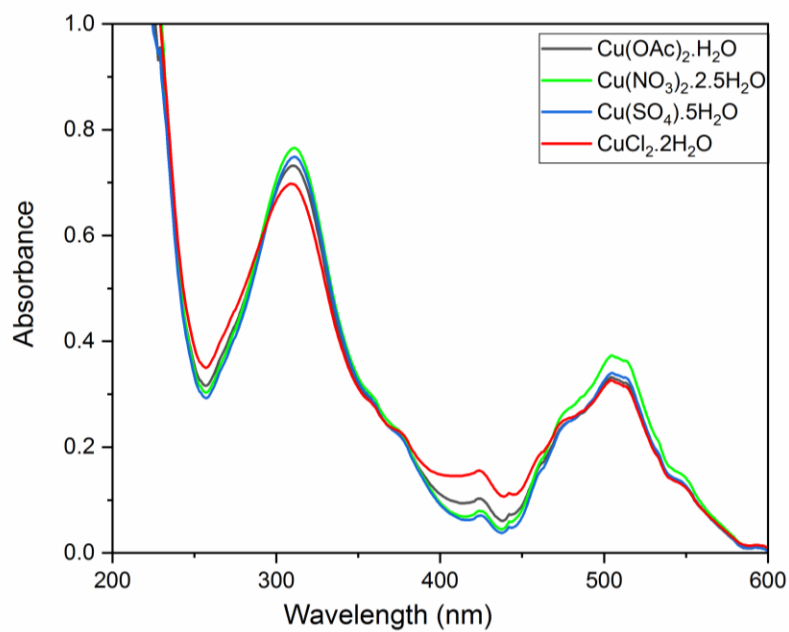

**Figure S6.** Absorption spectra of A01 (40  $\mu\text{M}$ ) in the presence of different salts of Copper (40  $\mu\text{M}$ ) in  $\text{CH}_3\text{CN-H}_2\text{O}$  (1:1, v/v; HEPES, 20 mM; pH = 7.4).

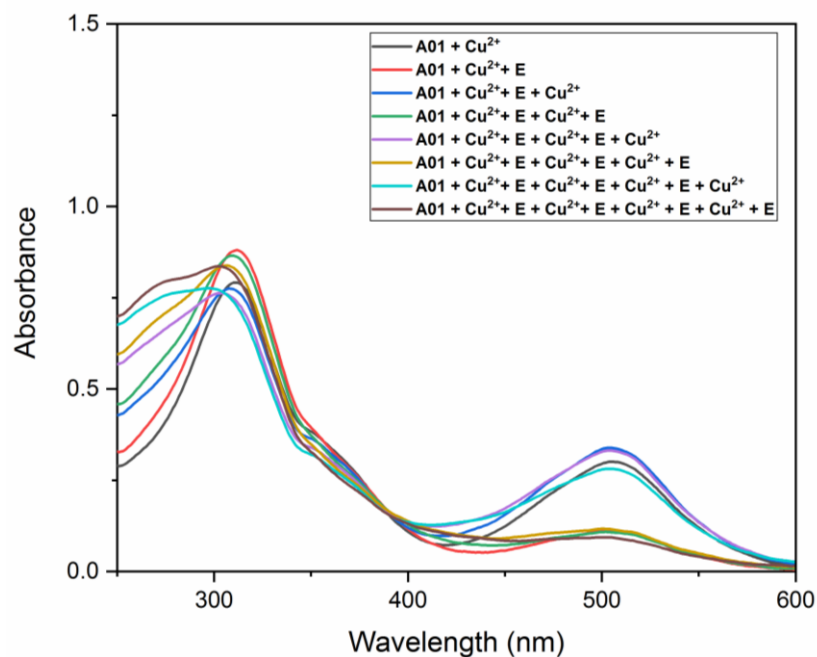

**Figure S7.** Reversible absorption spectral changes of A01 (40 μM) after sequential addition of Cu<sup>2+</sup> (1.0 eq.) and EDTA (1.0 eq.) in CH<sub>3</sub>CN-H<sub>2</sub>O (1:1, v/v; HEPES, 20 mM; pH = 7.4).

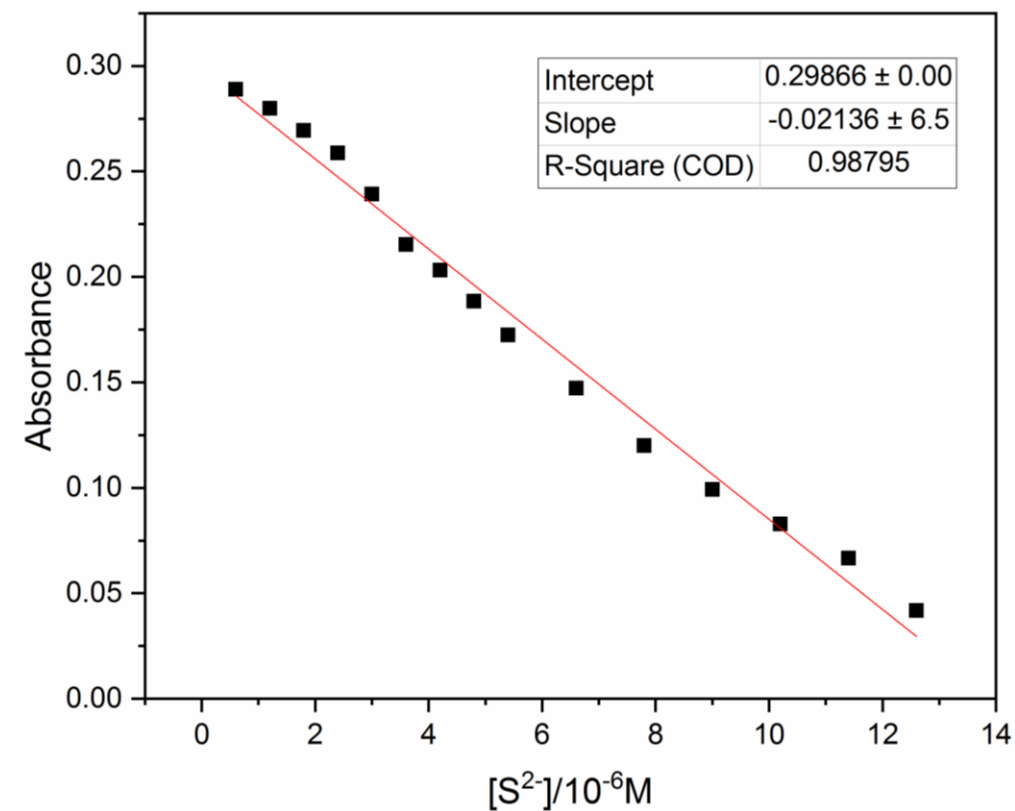

**Figure S8.** Determination of the detection limit of A01-Cu<sup>2+</sup> (40 μM) for S<sup>2-</sup> based on change of absorbance at 504 nm.

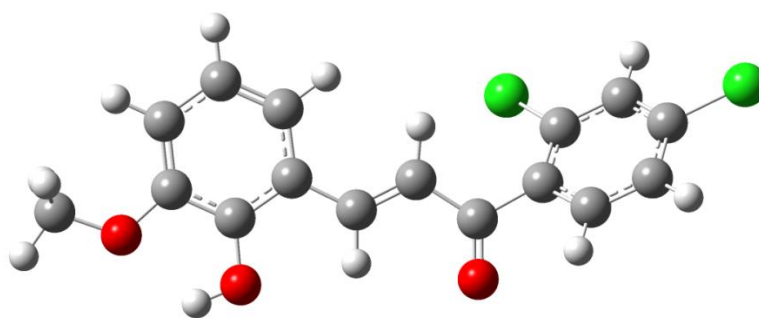

**Figure S9.** Optimized structure of A01

$E(\text{HUMO}) = -0.232 \text{ Ha}$

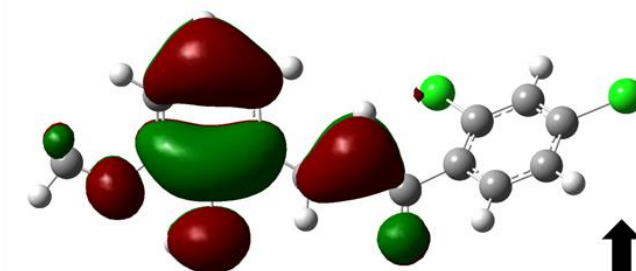

$E(\text{LUMO}) = -0.092 \text{ Ha}$

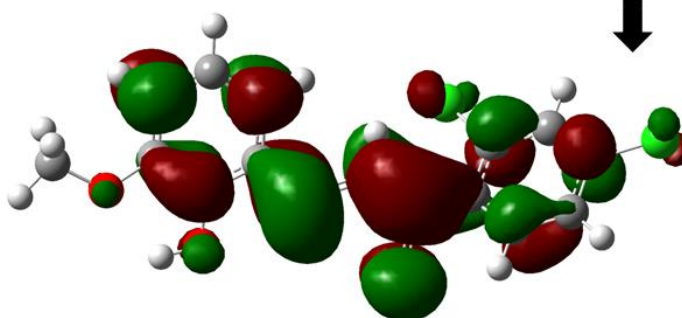

3.81 eV

**Figure S10.** HOMO and LUMO surfaces of optimized structure A01 and their respective energy values.

**Table S1.** Various global reactivity indices (in eV) of A01 in the gas phase

| Parameters                         | B3LYP |
|------------------------------------|-------|
| Vertical ionization potential (IP) | 6.31  |
| Electron affinity (EA)             | 2.50  |
| Chemical hardness ( $\eta$ )       | 1.90  |
| Chemical potential ( $\mu$ )       | -4.41 |
| Electrophilicity index( $\omega$ ) | 5.10  |



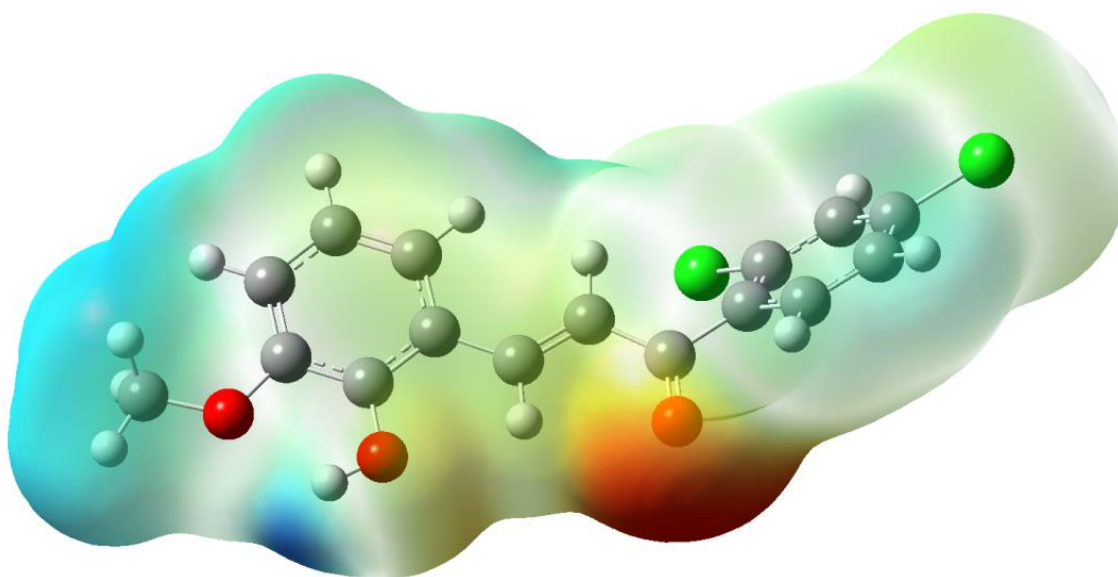

**Figure S11.** Molecular electrostatic potential map of A01
